# Supplementary material
Source: PubMed Central journal article supplement (PMC4276488)

## Supplementary Materials

---

### List of Food Items

1% Milk  
Apple Slices  
Avocado  
Banana  
Brownie  
Cheerios  
Cheese Nachos  
Cherries  
Chicken Nuggets  
Cookies  
Cucumber Slices  
Cupcakes  
Doritos  
Doughnuts  
French Fries  
Grapes  
Green Beans  
Grilled Cheese  
Grilled Chicken  
Hamburger  
Hard Boiled Eggs  
Hershey's Kisses  
Hotdog with Mustard  
Ice Cream  
M&Ms  
Macaroni and Cheese  
Orange Slices  
Pasta  
Pasta with Red Sauce  
Peaches  
Pickles  
Pizza  
Pretzels  
Raisins  
Rice Cakes  
Shrimp  
Skim Milk  
Sushi with Condiments  
Turkey Sandwich  
Vegetable Soup  
Whole Milk  
Yellow Rice and Beans  
Yogurt with Granola and Strawberries

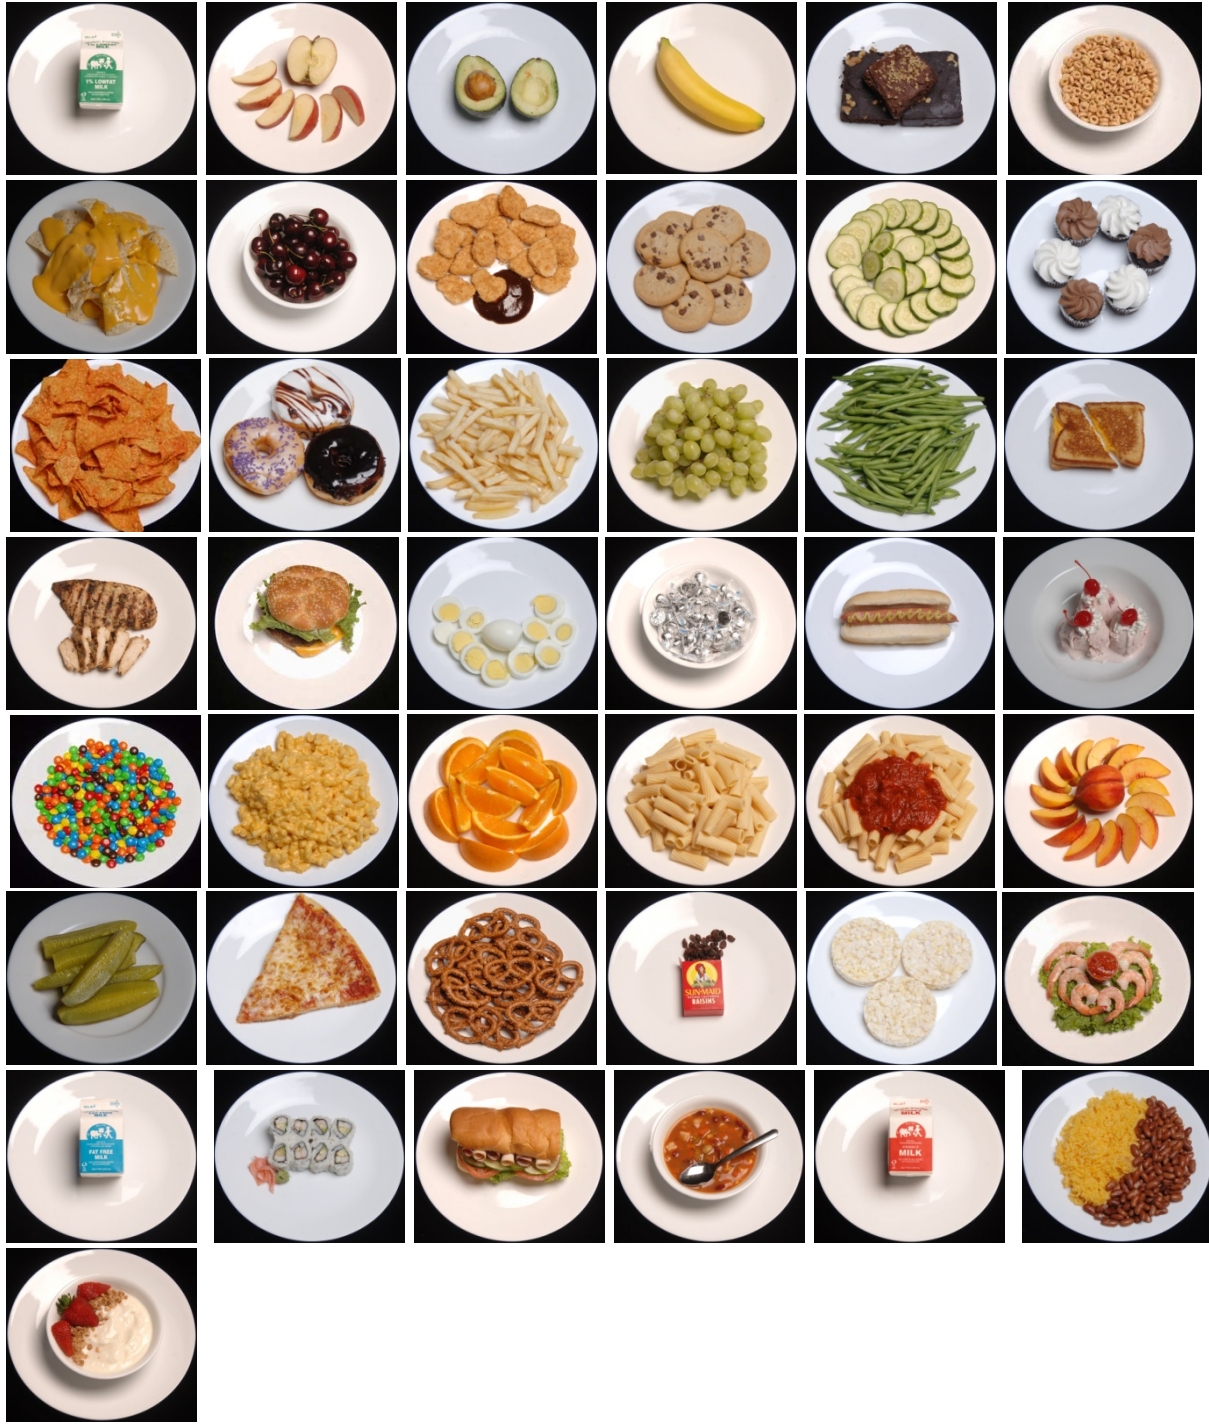

Supplement: NIHMS616333-supplement-Supp_Material.pdf [file NIHMS616333-supplement-Supp_Material.pdf]
